# Supplementary material
Source: Springer Nature journal article supplement (https://www.springermedizin.de/resource/supplementary/13027_2009_161_MOESM5_ESM.pdf/25656558)

Adenovirus:  
Δ E1A CR1 and/or CR2 (p300  
and pRB binding sites)

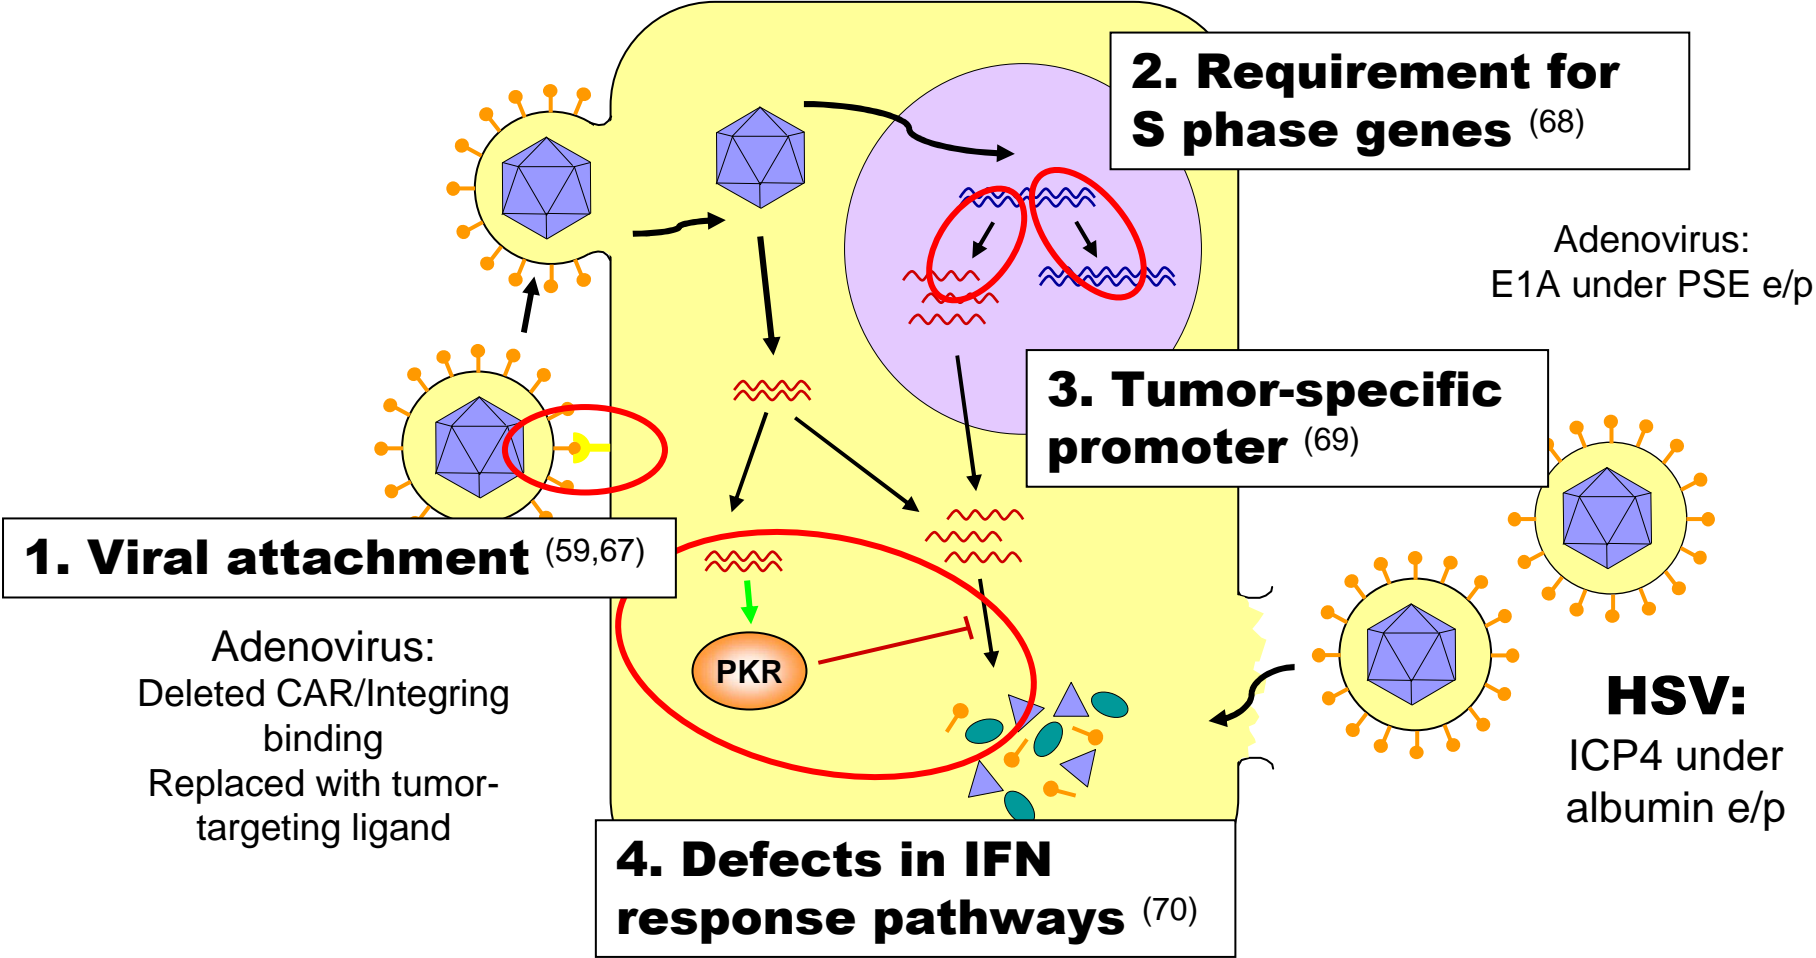

**HSV:**

ICP4 under  
albumin e/p

Supplement: MOESM5 [file 25656558]
